# Supplementary material for: Growth of, and diffusion in, olivine in ultra-fast ascending basalt magmas from Shiveluch volcano
Source: Springer Nature journal article supplement (doi:10.1038/s41598-018-30133-1), 2018-07-31
Supplement: MOESM8 [file 41598_2018_30133_MOESM8_ESM.%20Table%20SM6.xlsx]

## Sheet: Table SM6-A
Table SM6-A. The time intervals for the diffusion in the transition zone.
			Parameters for Fo - Eq. SM6.1				Parameters for Ni - Eq. SM6.2						Estimates by Fo				Estimates by Ni
Number	Sample, thin section, grain, profile	Part of profile	Fo1 (mol%)	Fo2 (mol%)	ΔFo (mm)	x0(Fo) (mm)	NiO1 (mol%)	NiO2 (mol%)	ΔNi (mm)	x0(Ni) (mm)	x0(Fo)-x0(Ni) (mm)	Geometric factor Apr	High DFo (m2/s)	Low DFo (m2/s)	Time intervals by Fo (d)		High DNi, m2/s	Low DNi, m2/s	Time intervals by Ni (d)		Resulting time intervals (d)
1	SHIV-08-05 17 Ol-6-1		89.6153	87.153	0.0121864	0.1349	0.409518	0.253782	0.0081626	0.1349	0	0.166702	2.1591e-16	1.11708e-16	11.9389	23.0756	3.42709e-16	1.72843e-16	3.37455	6.69099	3.37455	23.0756
2	SHIV-08-05 17 Ol-6-2	1	89.6354	87.1151	0.0106764	0.07501	0.429337	0.253108	0.00464645	0.07501	0	0.270347	2.1591e-16	1.11708e-16	5.65045	10.9212	3.42709e-16	1.72843e-16	0.674252	1.33689	0.674252	10.9212
3	SHIV-08-05 17 Ol-6-2	2	89.5551	87.1616	0.00973863	0.08719	0.421619	0.251027	0.00352876	0.08719	0	0.270347	2.1591e-16	1.11708e-16	4.70141	9.08692	3.42709e-16	1.72843e-16	0.388886	0.771074	0.388886	9.08692
4	SHIV-08-05-17 Ol-6-3		89.5608	87.2207	0.00794885	0.058	0.43186	0.262921	0.00344061	0.057	0.001	0.205872	2.1591e-16	1.11708e-16	4.11306	7.94977	3.42709e-16	1.72843e-16	0.485483	0.962603	0.485483	7.94977
5	SHIV-08-05-17 Ol-6-5		89.5669	87.2404	0.00797072	0.061	0.434717	0.263026	0.00366125	0.06	0.001	0.167548	2.1591e-16	1.11708e-16	5.08172	9.822	3.42709e-16	1.72843e-16	0.675492	1.33935	0.675492	9.822
6	SHIV-08-05-17 Ol-6-6		89.7229	87.1369	0.0129854	0.149	0.412186	0.25852	0.0090074	0.149	0	0.268854	2.1591e-16	1.11708e-16	8.40514	16.2455	3.42709e-16	1.72843e-16	2.5479	5.05192	2.5479	16.2455
7	SHIV-08-05 3-3 Ol-29-1		89.9334	86.5813	0.0154231	0.123	0.431321	0.321204	0.0105073	0.129	-0.006	0.839349	2.1591e-16	1.11708e-16	3.79801	7.34082	3.42709e-16	1.72843e-16	1.11056	2.20199	1.11056	7.34082
8	SHIV-08-05 3-3 Ol-29-2		89.7842	86.4437	0.012391	0.125	0.432324	0.308573	0.0131238	0.132	-0.007	0.848931	2.1591e-16	1.11708e-16	2.42379	4.68473	3.42709e-16	1.72843e-16	1.71295	3.3964	1.71295	4.68473
9	SHIV-08-05 3-6 Ol-13		89.5357	88.3337	0.0114266	0.176	0.42901	0.24199	0.00733442	0.171	0.005	0.167638	2.1591e-16	1.11708e-16	10.438	20.1747	3.42709e-16	1.72843e-16	2.70931	5.37196	2.70931	20.1747
