# Supplementary material for: Growth of, and diffusion in, olivine in ultra-fast ascending basalt magmas from Shiveluch volcano
Source: Sci Rep. 2018 Aug 6;8:11775. doi: 10.1038/s41598-018-30133-1 (PMC6079000; doi:10.1038/s41598-018-30133-1)
Supplement: Supplementary file 2 — Supplementary Table 1.1 [file 41598_2018_30133_MOESM2_ESM.xlsx]

## Sheet: Table SM.1.1-A
Table SM1.1-A. EMS measurement conditions
Element	Counting time on peak
Si	15
Mg	15
Fe	15
Mn	60
Co	180
Ni	260
Zn	120
Ca	120
Al	260
Cr	120
P	300

## Sheet: Table SM.1.1-B
Table SM1.1-B. San Carlos standards measured during olivines analysis and analytical statistics
Comment	SiO2	MgO	FeO	NiO	MnO	CaO	CoO	ZnO	Al2O3	P2O5	Cr2O3	Wt-total	Fo
Olivine_SC_Std	40.8682	49.4905	9.228	0.3936	0.1333	0.0931	0.018276	0.008	0.0299	0.0053	0.0267	100.293	90.5297
Olivine_SC_Std	40.8229	49.271	9.1926	0.3912	0.1359	0.0907	0.018766	0.0079	0.0476	0.0033	0.0308	100.01	90.5246
Olivine_SC_Std	40.3349	48.3595	9.2229	0.3932	0.1329	0.0918	0.0188309	<0.005	0.03	0.0045	0.024	98.6129	90.3345
Olivine_SC_Std	40.7864	49.1048	9.2806	0.3884	0.1359	0.093	0.0173197	0.011	0.0297	0.0052	0.0264	99.8765	90.4133
Olivine_SC_Std	40.8623	49.5412	9.0896	0.3931	0.1363	0.0929	0.0179834	0.0133	0.0304	0.0049	0.0251	100.205	90.6672
Olivine_SC_Std	41.0024	48.9899	9.1204	0.3932	0.1376	0.1052	0.0189288	0.0079	0.0307	0.0045	0.0252	99.8337	90.5431
Olivine_SC_Std	40.7207	49.431	9.1646	0.3906	0.136	0.0911	0.0180819	0.0074	0.0308	0.0034	0.0283	100.019	90.5784
Olivine_SC_Std	40.671	49.627	9.1231	0.393	0.1371	0.0955	0.0185814	<0.005	0.0306	0.0048	0.0261	100.128	90.6507
Olivine_SC_Std	40.8981	49.732	9.2144	0.395	0.1403	0.0948	0.0176427	0.0092	0.0319	0.0046	0.0238	100.559	90.584
Olivine_SC_Std	40.8138	49.2659	9.2566	0.3944	0.1363	0.0929	0.0189019	<0.005	0.032	0.0036	0.025	100.041	90.464
Olivine_SC_Std	40.787	49.0088	9.1236	0.3853	0.1316	0.092	0.0187151	0.0078	0.0293	0.0039	0.0267	99.6124	90.5434
Olivine_SC_Std	40.9261	49.1139	9.1913	0.3943	0.1358	0.0926	0.0178972	0.0097		0.0041	0.031	99.9895	90.4983
Olivine_SC_Std	40.7515	49.2775	9.2183	0.3896	0.1352	0.0919	0.0184727	<0.005	0.0341	0.0032	0.0276	99.9477	90.5017
Olivine_SC_Std	41.0991	49.6901	9.2705	0.3932	0.1351	0.0933	0.0194664	0.0107	0.0299	0.0055	0.0246	100.769	90.5248
Olivine_SC_Std	40.76	49.5362	9.2638	0.3889	0.1384	0.0913	0.0178616	0.0065	0.0293	0.0036	0.0264	100.26	90.5044
Olivine_SC_Std	40.8845	49.39	9.2576	0.39	0.1367	0.0909	0.0178599	0.0082	0.0303	0.0059	0.0284	100.238	90.4847
Olivine_SC_Std	41.2607	49.3786	9.2574	0.3906	0.1349	0.0923	0.0191267	0.0091	0.0273	0.0042	0.0236	100.596	90.4829
Olivine_SC_Std	40.9586	49.4217	9.2265	0.3929	0.1316	0.0913	0.0183213	0.007	0.031	0.0043	0.0253	100.306	90.5192
Olivine_SC_Std	40.8898	48.8943	9.2047	0.3881	0.1339	0.0914	0.0184208	0.0078	0.0296	0.0053	0.0287	99.6897	90.4472
Olivine_SC_Std	41.106	49.3471	9.2453	0.3856	0.134	0.0922	0.019008	<0.005	0.0296	0.0054	0.0263	100.392	90.4887
Olivine_SC_Std	41.2608	49.0816	9.2243	0.3914	0.1318	0.0916	0.0200004	0.0061	0.0313	0.0046	0.0252	100.266	90.4626
Olivine_SC_Std	40.9391	49.4841	9.1369	0.4008	0.1381	0.0889	0.0197132	0.0105		0.0033	0.0277	100.249	90.6141
Olivine_SC_Std	41.0603	49.2853	9.1948	0.4	0.1381	0.0908	0.0176499	0.0116		0.0023	0.0271	100.225	90.5258
Olivine_SC_Std	40.8036	49.1379	9.2915	0.3976	0.1392	0.0921	0.0190439	0.0112	0.0345	0.0046	0.0278	99.9563	90.4097
Olivine_SC_Std	40.9911	49.3323	9.1837	0.401	0.1408	0.093	0.0183681	0.016	0.0336	0.0048	0.0265	100.239	90.5443
Olivine_SC_Std	41.0499	49.1303	9.0766	0.3994	0.1389	0.0931	0.0186493	0.0059	0.0331	0.0044	0.0256	99.9732	90.6094
Olivine_SC_Std	40.7242	49.0456	9.1098	0.401	0.1368	0.0933	0.018305	0.0088	0.0332	0.0053	0.0246	99.5983	90.5636
Olivine_SC_Std	40.5543	49.5227	9.1781	0.4024	0.14	0.091	0.0175915	0.0115	0.0356	0.0025	0.0274	99.9805	90.5824
Olivine_SC_Std	39.9502	49.3559	9.0674	0.3987	0.1406	0.0931	0.0166515	0.0124	0.0321	0.0053	0.0261	99.0959	90.6569
Olivine_SC_Std	40.5038	49.3474	9.0029	0.3945	0.1379	0.0916	0.0169707	0.0109	0.0373	0.0032	0.026	99.57	90.7158
Olivine_SC_Std	40.3147	49.1528	9.0594	0.3966	0.1358	0.0946	0.0180774	0.0081	0.0498	0.0039	0.0293	99.2606	90.6294
Olivine_SC_Std	40.275	49.267	9.1915	0.3993	0.1431	0.093	0.0203653	0.0122	0.0364	0.0036	0.0265	99.4655	90.5257
Olivine_SC_Std	41.1656	49.2543	9.1425	0.3999	0.1387	0.0926	0.0184913	0.0135	0.0388	0.0043	0.0253	100.291	90.5692
Olivine_SC_Std	41.1662	49.4719	9.094	0.3979	0.1372	0.0922	0.0194905	0.012	0.0373	0.005	0.0277	100.458	90.652
Olivine_SC_Std	40.9995	49.6368	9.1923	0.3997	0.1408	0.0922	0.0186157	0.0119	0.0362	0.0049	0.0284	100.559	90.5889
Olivine_SC_Std	41.0018	49.2091	9.017	0.3978	0.1337	0.0935	0.0181162	0.0095	0.0357	0.0046	0.0246	99.9428	90.6789
Olivine_SC_Std	40.4846	49.2121	9.1663	0.3941	0.1394	0.0914	0.0165117	0.0082	0.0358	0.0028	0.0282	99.5769	90.5397
Olivine_SC_Std	41.0506	49.4989	9.198	0.3963	0.1387	0.0919	0.019068	0.0119	0.0349	0.0045	0.0301	100.472	90.5598
Olivine_SC_Std	40.828	49.4949	9.1954	0.3956	0.1386	0.092	0.0165733	0.0097	0.0349	0.0031	0.0265	100.233	90.5616
Olivine_SC_Std	40.3898	48.4234	9.2315	0.3944	0.1402	0.0925	0.01717	0.0134	0.0347	0.003	0.0291	98.7666	90.3387
Olivine_SC_Std	40.9485	49.2786	9.1532	0.3909	0.1296	0.0888	0.0182992	0.0112	0.0455	0.0037	0.0278	100.093	90.5635
Olivine_SC_Std	40.6371	49.1776	9.1575	0.3937	0.1351	0.0878	0.0189712	0.0063	0.0354	0.0046	0.0277	99.679	90.5419
Olivine_SC_Std	40.7685	49.2188	9.0471	0.3928	0.1301	0.0905	0.018664	0.009	0.0372	0.005	0.0298	99.7447	90.6523
Olivine_SC_Std	40.8046	49.4676	9.1696	0.396	0.1341	0.0875	0.0183719	<0.011	0.0279	0.0095	0.0289	100.149	90.5809
Olivine_SC_Std	40.1318	49.373	9.2215	0.3938	0.1311	0.0899	0.0175711	0.0086	0.0339	0.0038	0.0276	99.4301	90.5162
Olivine_SC_Std	40.72	48.8423	9.1888	0.3945	0.1342	0.0907	0.0186995	0.0096	0.0358	0.0032	0.0319	99.4673	90.4537
Olivine_SC_Std	40.5472	49.4097	9.2226	0.3912	0.1376	0.0906	0.0176856	0.0143	0.0357	0.0042	0.0266	99.895	90.5215
Olivine_SC_Std	40.7689	49.1713	9.2805	0.3933	0.1337	0.0904	0.0187142	0.0109	0.0376	0.003	0.0273	99.9332	90.4259
Olivine_SC_Std	40.7187	48.794	9.1582	0.3933	0.1344	0.092	0.0179571	0.0093	0.0371	0.0033	0.0299	99.3851	90.474
Olivine_SC_Std	40.312	48.502	9.217	0.392	0.1354	0.0904	0.0181172	0.0127	0.0358	0.0036	0.0287	98.7447	90.3665
Olivine_SC_Std	40.454	48.2366	9.2355	0.392	0.1325	0.0912	0.0180615	0.011	0.0339	0.0033	0.0292	98.6342	90.3011
Olivine_SC_Std	40.5537	49.5353	9.2633	0.3893	0.1421	0.0919	0.0138019	<0.011	0.0262	0.0065	0.0329	100.062	90.5055
Olivine_SC_Std	40.8	49.5028	9.2335	0.3939	0.1376	0.0894	0.0165037	0.0097	0.0372	0.0041	0.0267	100.25	90.5275
Olivine_SC_Std	40.7131	49.2873	9.1961	0.3923	0.1335	0.0907	0.0164702	0.0087	0.0369	0.005	0.0272	99.9057	90.5249
Olivine_SC_Std	41.0799	49.3073	9.0918	0.3913	0.1313	0.0904	0.0165782	0.0064	0.0359	0.0031	0.0281	100.18	90.6258
Olivine_SC_Std	40.6926	49.1621	9.1187	0.3923	0.1481	0.0888	0.0183763	<0.011	0.0321		0.0267	99.6795	90.5755
Olivine_SC_Std	40.9478	49.031	9.1858	0.3922	0.1352	0.0891	0.0174856	0.0132	0.0363	0.0036	0.0262	99.8751	90.4898
Olivine_SC_Std	40.2574	49.0039	9.1102	0.3917	0.1378	0.0894	0.0175869	0.0063	0.037	0.0044	0.0242	99.0771	90.5559
Olivine_SC_Std, Al-program	40.4662	49.5606	9.142	0.389	0.1364	0.0895	0.016505	0.0145	0.0326		0.0293	99.8737	90.6225
Olivine_SC_Std, Al-program	40.4344	49.3175	9.1671	0.3907	0.1339	0.0891	0.0172878	0.0144	0.0323		0.0251	99.6188	90.5572
Olivine_SC_Std, Al-program	40.6188	49.0291	9.0636	0.3916	0.133	0.0894	0.0173986	0.015	0.0331		0.028	99.4161	90.6041
Olivine_SC_Std, Al-program	40.5289	49.2133	9.0945	0.3914	0.1345	0.0896	0.0170621	0.0169	0.0323		0.0299	99.5455	90.607
Olivine_SC_Std, Al-program	40.55	49.2421	9.1015	0.3911	0.1345	0.0909	0.0173686	0.0155	0.0318		0.03	99.6019	90.6054
All profiles (n=63)	SiO2	MgO	FeO	NiO	MnO	CaO	CoO	ZnO	Al2O3	P2O5	Cr2O3	Wt-total	Fo
Reference SC-GOE	40.81	49.42	9.29	0.391	0.14	0.093	0.019	0.007	0.033	0.0045	0.0299617	100.237	90.4607
Average	40.7487	49.2362	9.17342	0.393697	0.136237	0.0916286	0.0180543	0.0103691	0.0339783	0.00427018	0.0272921	99.8698	90.5364
Standard Deviation (2 sigma)	0.560806	0.607799	0.138075	0.00761967	0.00671621	0.0047812	0.00209078	0.00555936	0.0086914	0.00228034	0.00406802	0.96187	0.169254
RSD (% 2 sigma)	1.37625	1.23446	1.50516	1.93541	4.92982	5.21803	11.5805	53.6147	25.5792	53.4015	14.9055	0.963124	0.186945
Error by counting statistics (2-sigma)	0.24	0.3	0.12	0.003	0.0035	0.0016	0.0017	0.0033	0.0013	0.0017	0.0022
Relative deviations (%)	0.150088	0.371962	1.25493	0.689725	2.68821	1.47465	4.97722	48.1299	2.96465	5.10721	8.91009	0.366757	0.0837322
Detection limits (µg/g) 2-sigma	0.055	0.04	0.054	0.0018	0.003	0.0014	0.0014	0.003	0.0008	0.001
Al-program (n=5)
Reference SC-GOE	40.81	49.42	9.29	0.391	0.14	0.093	0.019	0.007	0.033	0.0045	0.0299617	100.237	90.4607
Average	40.5197	49.2725	9.11374	0.39076	0.13446	0.0897	0.0171244	0.01526	0.03242		0.02846	99.6112	90.5985
Standard Deviation (2 sigma)	0.144782	0.385615	0.0817309	0.00208135	0.00249239	0.00139284	0.000740986	0.00203273	0.00095289		0.00408069	0.333813	0.049286
RSD (% 2 sigma)	0.357313	0.782617	0.896787	0.53264	1.85363	1.55277	4.32707	13.3207	2.93921		14.3383	0.335116	0.0544005
Error by counting statistics (2-sigma)	0.24	0.3	0.12	0.003	0.0035	0.0016	0.0017	0.0033	0.00084		0.0022
Relative deviations (%)	0.711443	0.298422	1.89731	0.0613811	3.95714	3.54839	9.87141	118	1.75758		5.01199	0.624778	0.152337
Detection limits (µg/g) 2-sigma	0.055	0.04	0.054	0.0018	0.003	0.0014	0.0014	0.003	0.00056	0.001
	wt-total	Fo	SiO2	MgO	FeO	NiO	MnO	CaO	CoO	Al2O3	Cr2O3	P2O5	ZnO
relative Difference Av-recomm: (%)	-0.366757	0.0837322	-0.150088	-0.371962	-1.25493	0.689725	-2.68821	-1.47465	-4.97722	2.96465	-8.91009	-5.10721	48.1299
relative error by counting statistics (%)			0.588975	0.609308	1.30813	0.762008	2.56906	1.74618	9.41602	3.82597	8.06095	39.811	31.8254
AV - Standard Deviation (2 sigma)	-1.32988	-0.103213	-1.52634	-1.60642	-2.76009	-1.24569	-7.61803	-6.69268	-16.5577	-22.6146	-23.8156	-58.5088	-5.48485
AV + Standard Deviation (2 sigma)	0.596367	0.270677	1.22617	0.862494	0.250236	2.62514	2.24161	3.74337	6.60328	28.5439	5.99541	48.2943	101.745

## Sheet: Table SM1.1-C
Table SM1.1-C. Conditions of measurements for element maps
Element, line	Detection system	Analyzer crystal
Mg, Ka	EDS
Fe, Ka	EDS
Ni, Ka	WDS	LIFH
Ca, Ka	WDS	PET
Al, Ka	WDS	TAP
P, Ka	WDS	PETH
Cr, Ka	WDS	PET

## Sheet: Table 1.1-D
Table SM1.1-D. Element distribution maps
File number	Sample, thin section, grain	Dwell time (ms)	Points	Stepwidth, μm
83	SHIV-08-05 17 Ol-7	100	720*500	0.85*0.85
84	SHIV-08-05 17 Ol-8	100	500*500	1.25*1.25
85	SHIV-08-05 17 Ol-8	210	500*500	0.4*0.4
89	SHIV-08-05 17 Ol-6	100	500*500	0.1*0.1
102	SHIV-08-05 3-5 Ol-20	140	350*500	1.6*1.6
