# Supplementary material for: Growth of, and diffusion in, olivine in ultra-fast ascending basalt magmas from Shiveluch volcano
Source: Sci Rep. 2018 Aug 6;8:11775. doi: 10.1038/s41598-018-30133-1 (PMC6079000; doi:10.1038/s41598-018-30133-1)
Supplement: Supplementary file 6 — Supplementary Table 4 [file 41598_2018_30133_MOESM6_ESM.xlsx]

## Sheet: Table SM4-A
Table SM4-A. The time intervals for the outer core diffusion
								Estimates by Fo				Estimates by Ni
Number	Sample, thin section, grain, profile	Part of profile	xdm (mm)	xcentre-xdm (mm)	ΔFo (mm)	ΔNi (mm)	Geometric factor - Apr	High DFo (m2/s)	Low DFo (m2/s)	Time intervals by Fo (d)		High DNi (m2/s)	Low DNi (m2/s)	Time intervals by Ni (d)		Resulting time intervals (d)
1	SHIV-08-07 10 Ol-4	1	0.01	0.361	0.146	0.135	0.329385	2.89541e-16	1.05883e-16	646.723	1768.49	4.5332e-16	1.56501e-16	353.171	1106.35	353.171	1768.49
2	SHIV-08-07 10 Ol-4	2	0.036	0.325	0.163	0.151	0.329385	2.89541e-16	1.05883e-16	806.097	2204.31	4.5332e-16	1.56501e-16	441.847	1381.56	441.847	2204.31
3	SHIV-08-05 17 Ol-7-2	1	0.037	0.186	0.107	0.099	0.167005	2.89541e-16	1.05883e-16	685.099	1873.44	4.5332e-16	1.56501e-16	374.595	1172.73	374.595	1873.44
4	SHIV-08-05 17 Ol-7-2	2	0.043	0.18	0.095	0.088	0.167005	2.89541e-16	1.05883e-16	540.049	1476.79	4.5332e-16	1.56501e-16	295.976	925.519	295.976	1476.79
5	SHIV-08-05 3-5 Ol-2		0.032	0.217	0.132	0.122	0.773925	2.89541e-16	1.05883e-16	224.991	615.248	4.5332e-16	1.56501e-16	122.756	384.719	122.756	615.248
